# Supplementary material
Source: HighWire-hosted journal article supplement (https://www.annfammed.org/highwire/filestream/16382/field_highwire_adjunct_files/0/Weghorst_Supp_Table_1.pdf)
Supplement: Weghorst_Supp_Table_1.pdf [file Weghorst_Supp_Table_1.pdf]

## Supplemental materials for

Weghorst AA, Van den Brink MJ, Bonvanie IJ, et al. Acute gastroenteritis: a qualitative study of parental motivations, expectations, and experiences during out-of-hours primary care. *Ann Fam Med*. 2023;21(5):432-439.

**Weghorst Supplemental Table 1**

| <b>Backgrounds of the Research Group Members</b> |                                                                              |
|--------------------------------------------------|------------------------------------------------------------------------------|
| <b>Name</b>                                      | <b>Background</b>                                                            |
| Anouk A.H. Weghorst                              | MD/PhD candidate, MD                                                         |
| Marian J. van den Brink                          | General practitioner, epidemiologist, MD, PhD                                |
| Irma J. Bonvanie                                 | Trainee pediatrician, MD, PhD                                                |
| Jolanda Tuinstra                                 | Sociologist, health and well-being, PhD                                      |
| Maria van Gosliga                                | Remedial educationalist, behavioral scientist, mother of young children, MD  |
| Gea A. Holtman                                   | Assistant professor, epidemiologist, PhD                                     |
| Elleke G.M. Landeweer                            | Empirical ethics researcher, PhD                                             |
| Marjolein Y. Berger                              | Professor of general practice, general practitioner, epidemiologist, MD, PhD |
